# Supplementary material for: An aggregation induced emission active bis-heteroleptic ruthenium(ii) complex for luminescence light-up detection of pyrophosphate ions
Source: Royal Society of Chemistry journal article supplement (doi:10.1039/d2dt03469g), 2023-01-01
Supplement: d2dt03469g1.pdf [file d2dt03469g1.pdf]

## Electronic Supplementary Information (ESI)

*For*

# Aggregation Induced Emission Active Bis-heteroleptic Ruthenium(II) Complex for Luminescent Light-up Detection of Pyrophosphate Ion

Sumit Kumar Patra,<sup>a</sup> Monosh Rabha,<sup>a</sup> Bhaskar Sen,<sup>a</sup> Kripamoy Aguan<sup>b</sup> and Snehadrinarayan Khatua\*<sup>a</sup>

<sup>a</sup>*Centre for Advanced Studies, Department of Chemistry, North-Eastern Hill University, Shillong, Meghalaya 793022, India.*

*Email: [snehadri@gmail.com](mailto:snehadri@gmail.com); [skhatua@nehu.ac.in](mailto:skhatua@nehu.ac.in)*

<sup>b</sup>*Department of Biotechnology and Bioinformatics, North-Eastern Hill University, Shillong, Meghalaya 793022, India*

## Table of Contents

| Contents                                                   | Page no |
|------------------------------------------------------------|---------|
| 1. Compound used in this study                             | S2      |
| 2. NMR spectra of <b>L1</b>                                | S3      |
| 3. ESI-MS spectrum of <b>L1</b>                            | S4      |
| 4. NMR spectra of <b>1[PF<sub>6</sub>]<sub>2</sub></b>     | S4-S6   |
| 5. ESI-MS spectrum of <b>1[PF<sub>6</sub>]<sub>2</sub></b> | S7      |
| 6. X-ray Crystallography                                   | S7      |
| 7. Crystal Structures                                      | S8      |
| 8. Data collection and refinement details                  | S9      |
| 9. Table for bond lengths and angles                       | S10     |
| 10. <sup>31</sup> P NMR spectra in CD <sub>3</sub> CN      | S10     |
| 11. Table for theoretical bond lengths and angles          | S11     |
| 12. X,Y,Z cartesian coordinates                            | S12     |
| 13. References                                             | S13     |

**Chart S1:** Compound used in this study

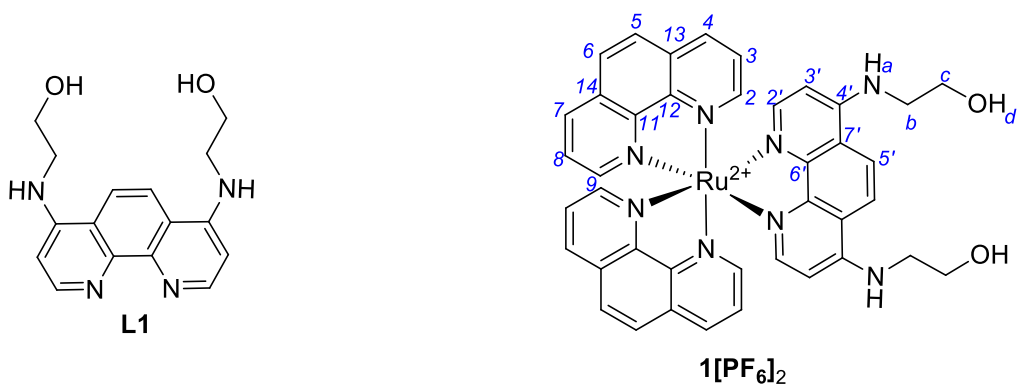

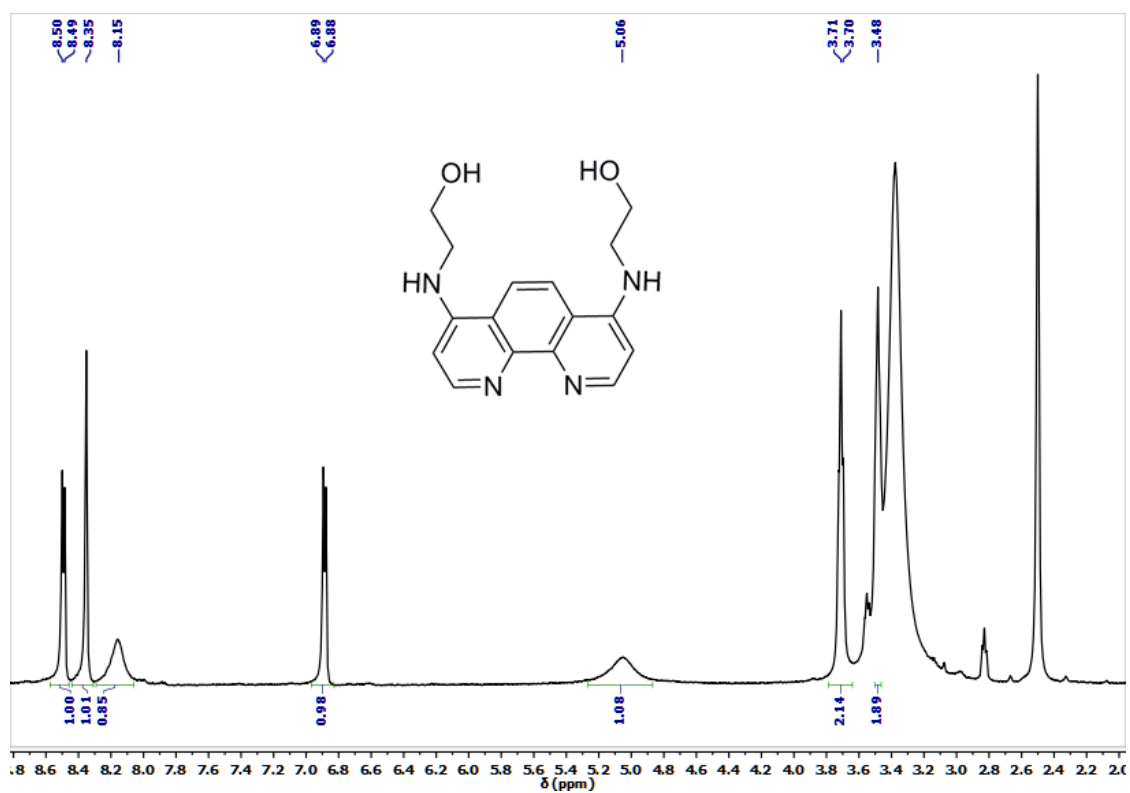

**Figure S1.**  $^1\text{H}$  NMR spectrum of L1 in  $\text{DMSO-}d_6$ .

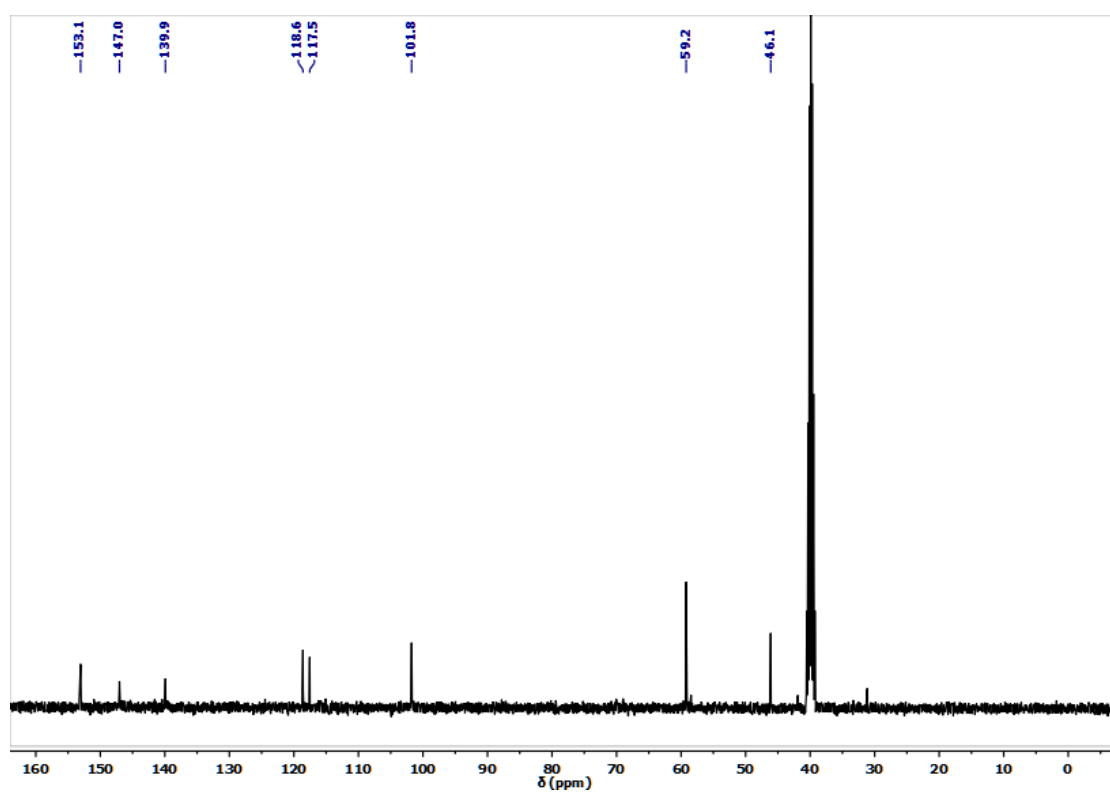

**Figure S2.**  $^{13}\text{C}$  NMR spectrum of L1 in  $\text{DMSO-}d_6$ .

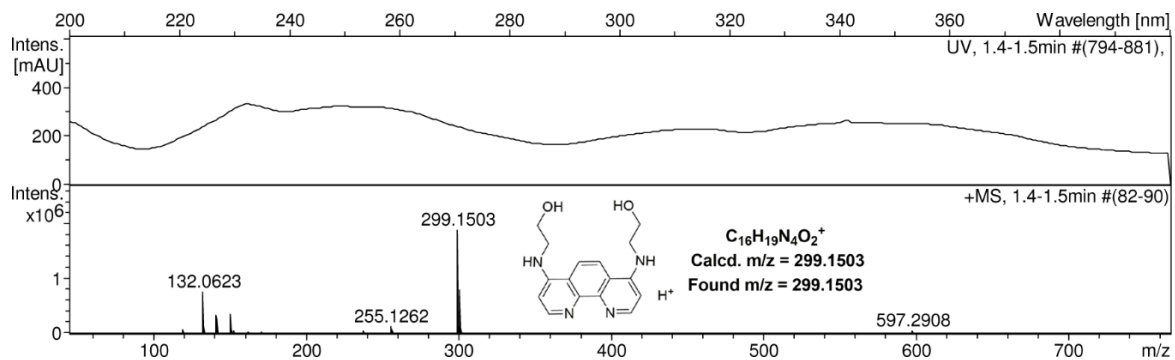

**Figure S3.** ESI-MS spectrum of **L1** in  $CH_3OH$

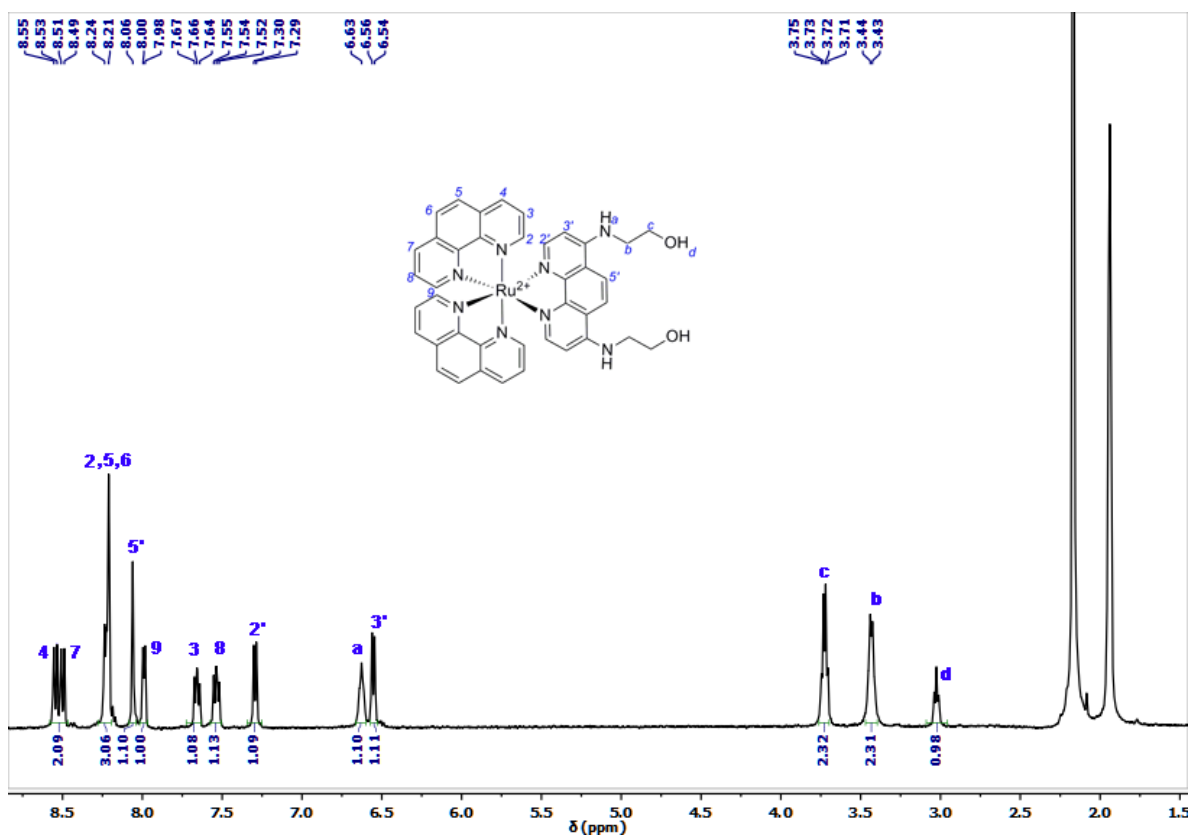

**Figure S4.**  $^1H$  NMR spectrum of **1**[ $PF_6$ ] $_2$  in  $CD_3CN$ .

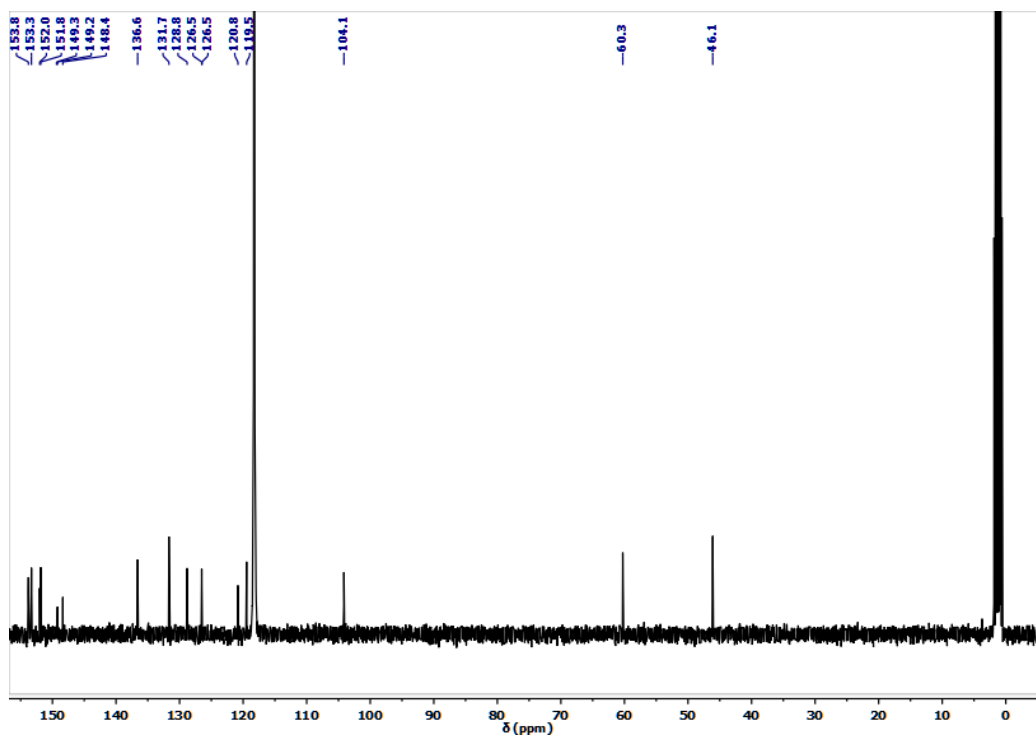

Figure S5.  $^{13}\text{C}$  NMR spectrum of  $1[\text{PF}_6]_2$  in  $\text{CD}_3\text{CN}$ .

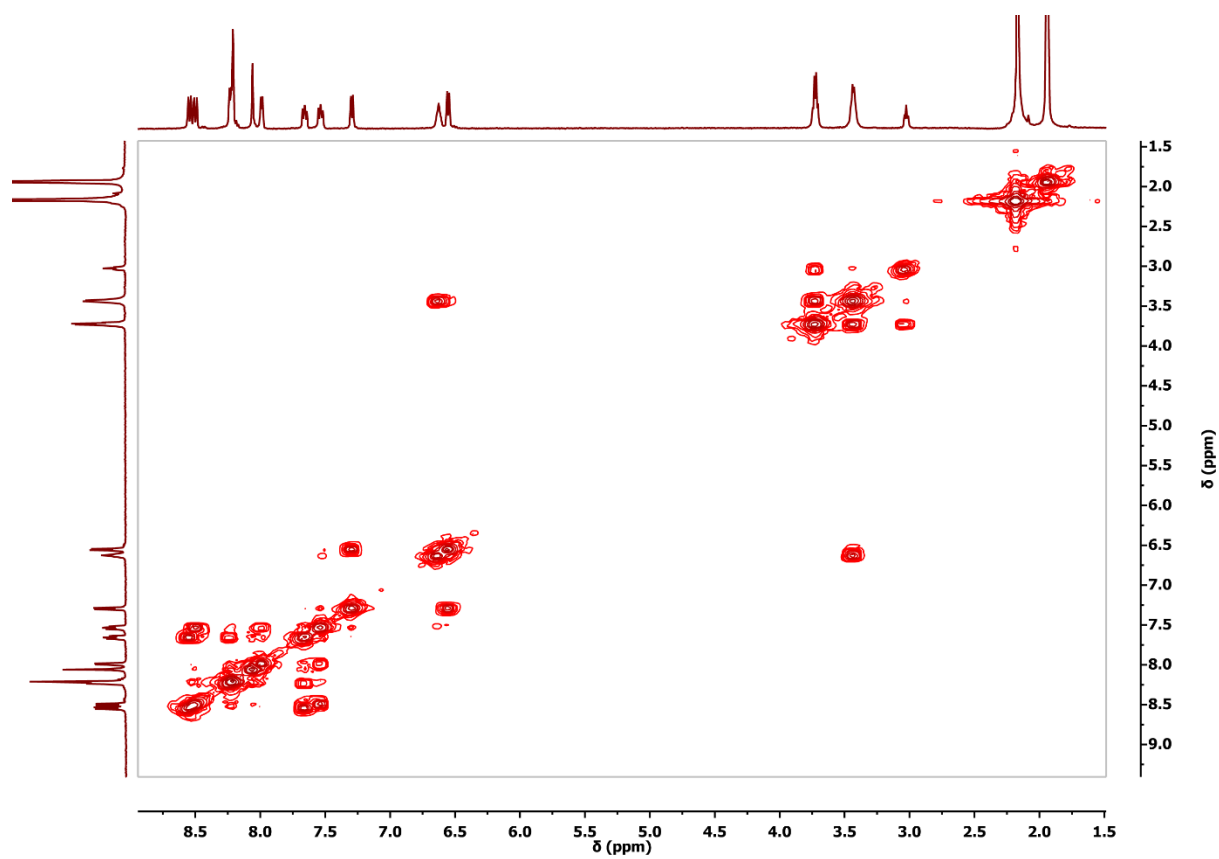

Figure S6.  $^1\text{H}$ - $^1\text{H}$  COSY NMR spectrum of  $1[\text{PF}_6]_2$  in  $\text{CD}_3\text{CN}$ .

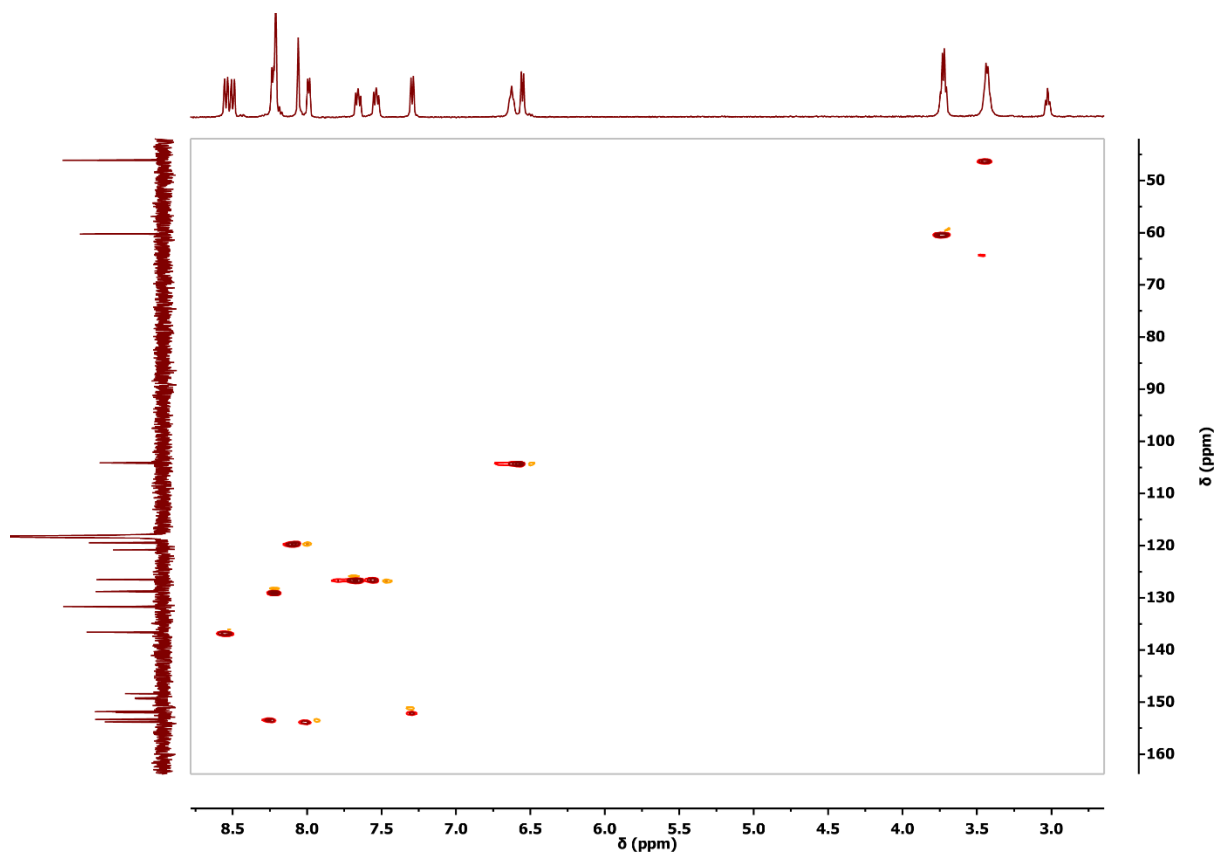

**Figure S7.**  $^1\text{H}$ - $^{13}\text{C}$  HSQC NMR spectrum of  $1[\text{PF}_6]_2$  in  $\text{CD}_3\text{CN}$ .

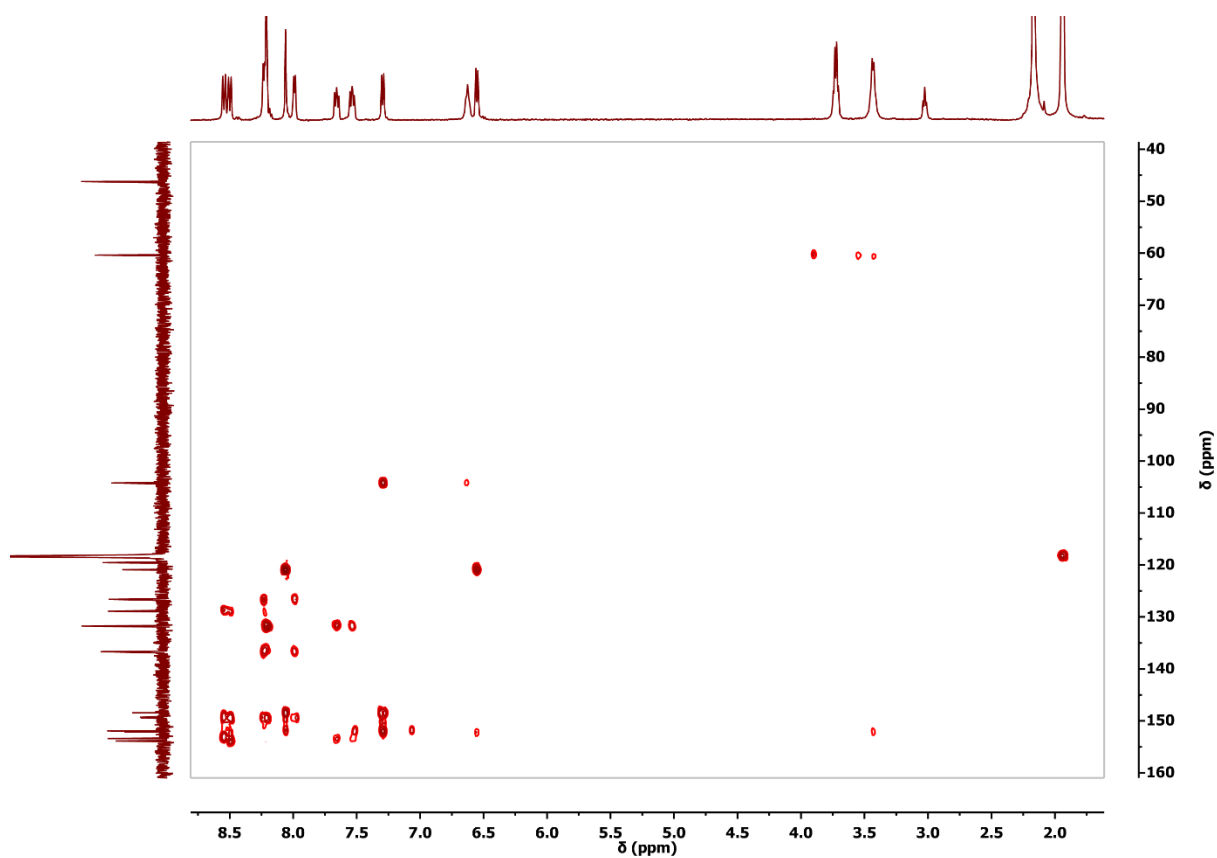

**Figure S8.** Partial  $^1\text{H}$ - $^{13}\text{C}$  HMBC NMR spectrum of  $1[\text{PF}_6]_2$  in  $\text{CD}_3\text{CN}$ .

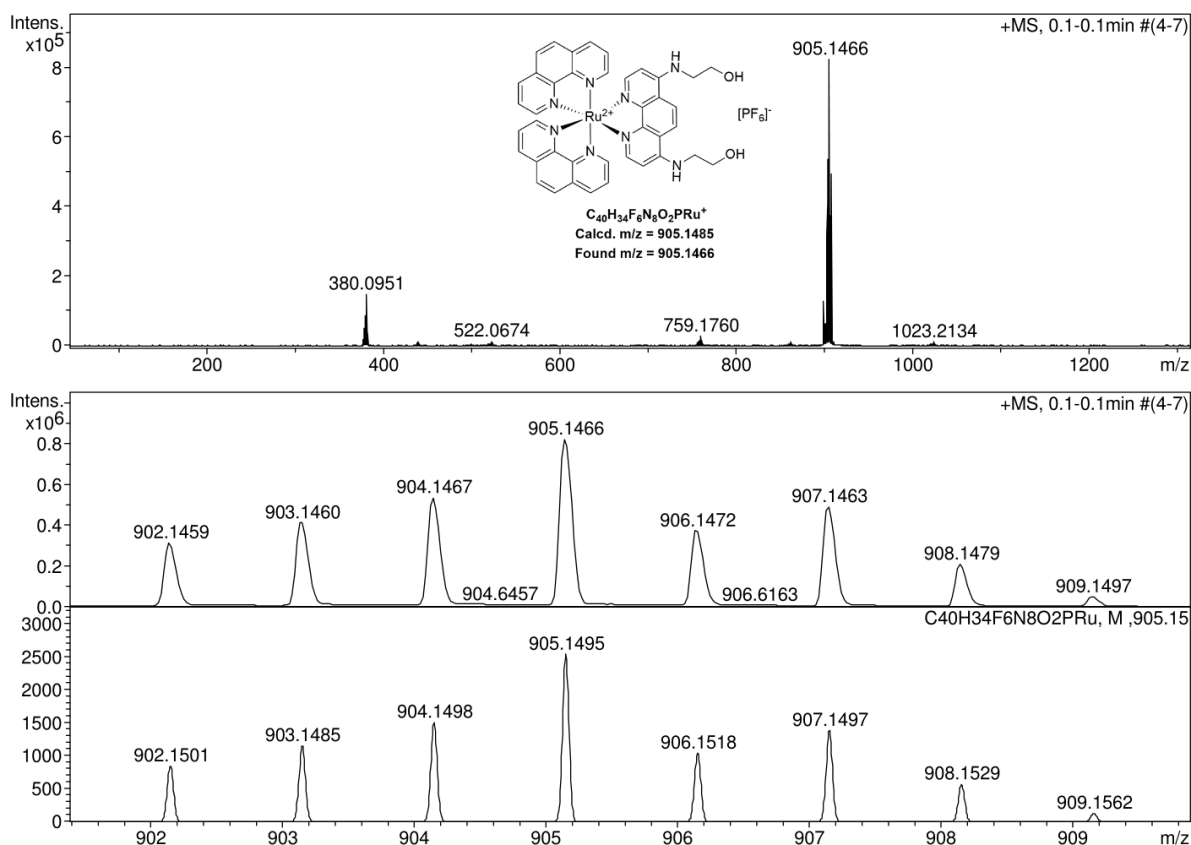

**Figure S9.** ESI-MS spectrum of **1**[PF<sub>6</sub>]<sub>2</sub> in CH<sub>3</sub>CN.

### X-ray Crystallography

The single crystal X-ray data of **1**[PF<sub>6</sub>]<sub>2</sub> was collected at 293 K on a Bruker APEX II CCD diffractometer using graphite-monochromated MoK $\alpha$  radiation ( $\lambda = 0.71073$  Å). The data integration and reduction were processed with SAINT<sup>1</sup> software. A multi-scan absorption correction (SADABS)<sup>2</sup> was applied to the collected reflections. The structure was solved by direct methods using the programs SHELXT<sup>3</sup> and refined by full-matrix least-squares calculations ( $F^2$ ) using the SHELXL-2018/3 software<sup>4</sup> within the WinGX<sup>5</sup> environment. All non-H atoms except six atoms (O1, O2, C10, C18, C32, and C33) were refined anisotropically against  $F^2$  for all reflections. Due to the very weak crystal dataset, O1, O2, C10, C18, C32, and C33 have high ADP; therefore, they were refined isotropically. All hydrogen atoms were placed at their calculated positions and refined isotropically. Crystal data collection and refinement details of selected bond lengths and angles for **1**[PF<sub>6</sub>]<sub>2</sub> are given in Table S1 and S2, respectively. The .cif file was deposited with the Cambridge Crystallographic Data Centre, and the following code was allocated: *CCDC No 2215176*.

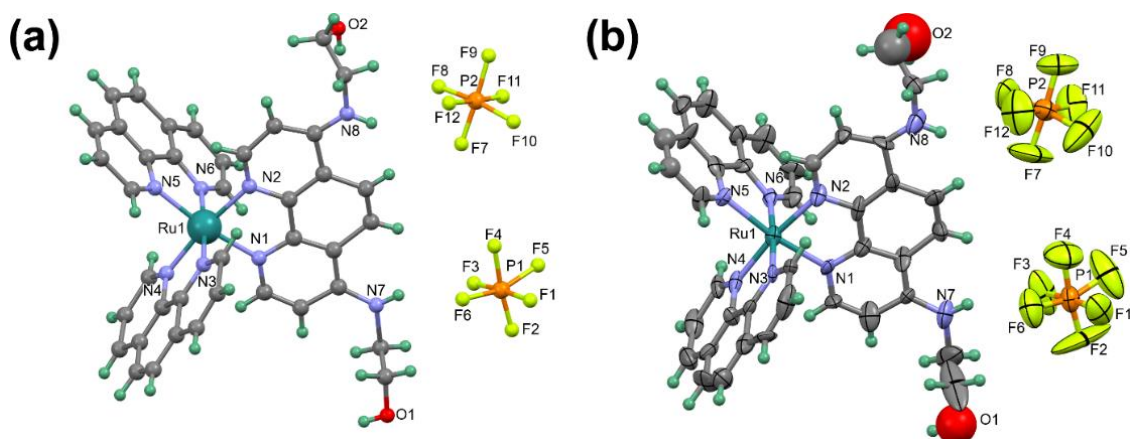

**Figure S10.** (a) Ball and stick representation of compound  $1[\text{PF}_6]_2$  (b) ORTEP of compound  $1[\text{PF}_6]_2$  with 30% thermal ellipsoid probability. Only non-carbon and non-hydrogens are labelled.

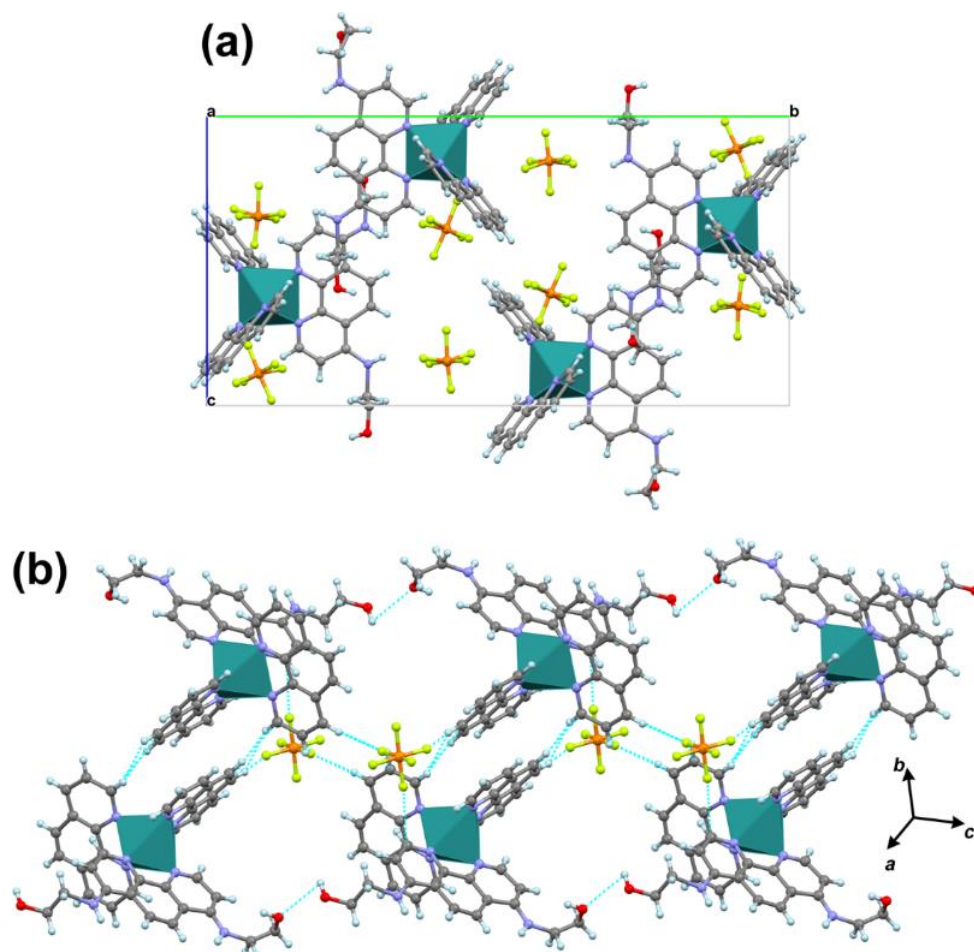

**Figure S11.** View of the (a) unit cell packing diagram along crystallographic  $a$ -axis and (b) 2-dimensional (2D) network formed through the weak supramolecular interaction.



**Table S1** Crystal data and structure refinement for **1[PF<sub>6</sub>]<sub>2</sub>**

|                                      |                                                                                                 |                              |
|--------------------------------------|-------------------------------------------------------------------------------------------------|------------------------------|
| Empirical formula                    | C <sub>40</sub> H <sub>34</sub> F <sub>12</sub> N <sub>8</sub> O <sub>2</sub> P <sub>2</sub> Ru |                              |
| Formula weight                       | 1049.76                                                                                         |                              |
| Temperature                          | 293(2) K                                                                                        |                              |
| Wavelength                           | 0.71073 Å                                                                                       |                              |
| Crystal system                       | Monoclinic                                                                                      |                              |
| Space group                          | P2 <sub>1</sub> /n                                                                              |                              |
| Unit cell dimensions                 | $a = 12.766(4)$ Å                                                                               | $\alpha = 89.982(8)^\circ$ . |
|                                      | $b = 29.689(8)$ Å                                                                               | $\beta = 101.429(8)^\circ$ . |
|                                      | $c = 15.064(4)$ Å                                                                               | $\gamma = 90.015(9)^\circ$ . |
| Volume                               | 5596(3) Å <sup>3</sup>                                                                          |                              |
| Z                                    | 4                                                                                               |                              |
| Density (calculated)                 | 1.246 Mg/m <sup>3</sup>                                                                         |                              |
| Absorption coefficient               | 0.413 mm <sup>-1</sup>                                                                          |                              |
| F(000)                               | 2112                                                                                            |                              |
| Crystal size                         | 0.180 x 0.110 x 0.090 mm <sup>3</sup>                                                           |                              |
| Theta range for data collection      | 1.914 to 28.591°.                                                                               |                              |
| Index ranges                         | -16 ≤ h ≤ 17, -39 ≤ k ≤ 39, -20 ≤ l ≤ 20                                                        |                              |
| Reflections collected                | 138492                                                                                          |                              |
| Independent reflections              | 14102 [R(int) = 0.6848]                                                                         |                              |
| Completeness to theta = 25.242°      | 99.7 %                                                                                          |                              |
| Absorption correction                | Semi-empirical from equivalents                                                                 |                              |
| Max. and min. transmission           | 0.946 and 0.929                                                                                 |                              |
| Refinement method                    | Full-matrix least-squares on F <sup>2</sup>                                                     |                              |
| Data / restraints / parameters       | 14102 / 8 / 558                                                                                 |                              |
| Goodness-of-fit on F <sup>2</sup>    | 1.200                                                                                           |                              |
| Final R indices [ $I > 2\sigma(I)$ ] | R1 = 0.2246, wR2 = 0.4580                                                                       |                              |
| R indices (all data)                 | R1 = 0.4986, wR2 = 0.5491                                                                       |                              |
| Largest diff. peak and hole          | 2.099 and -0.821 e.Å <sup>-3</sup>                                                              |                              |

**Table S2.** Selected bond lengths [ $\text{\AA}$ ] and angles [ $^\circ$ ] for **1**[PF<sub>6</sub>]<sub>2</sub>.

| <b>Bond lengths(<math>\text{\AA}</math>)</b> |           |            |           |
|----------------------------------------------|-----------|------------|-----------|
| N(1)-Ru(1)                                   | 2.099(12) | N(2)-Ru(1) | 2.096(12) |
| N(3)-Ru(1)                                   | 2.006(13) | N(4)-Ru(1) | 2.025(14) |
| N(5)-Ru(1)                                   | 2.084(11) | N(6)-Ru(1) | 2.089(13) |

  

| <b>Bond Angles(<math>^\circ</math>)</b> |         |                 |          |
|-----------------------------------------|---------|-----------------|----------|
| N(3)-Ru(1)-N(4)                         | 79.5(6) | N(3)-Ru(1)-N(6) | 176.4(5) |
| N(4)-Ru(1)-N(6)                         | 97.9(6) | N(3)-Ru(1)-N(5) | 98.7(5)  |
| N(4)-Ru(1)-N(5)                         | 93.7(5) | N(6)-Ru(1)-N(5) | 78.9(5)  |
| N(3)-Ru(1)-N(1)                         | 87.6(4) | N(4)-Ru(1)-N(1) | 93.4(5)  |
| N(6)-Ru(1)-N(1)                         | 95.1(5) | N(5)-Ru(1)-N(1) | 171.3(5) |
| N(3)-Ru(1)-N(2)                         | 94.5(5) | N(4)-Ru(1)-N(2) | 171.5(5) |
| N(6)-Ru(1)-N(2)                         | 88.3(5) | N(5)-Ru(1)-N(2) | 93.2(5)  |
| N(1)-Ru(1)-N(2)                         | 80.3(5) |                 |          |

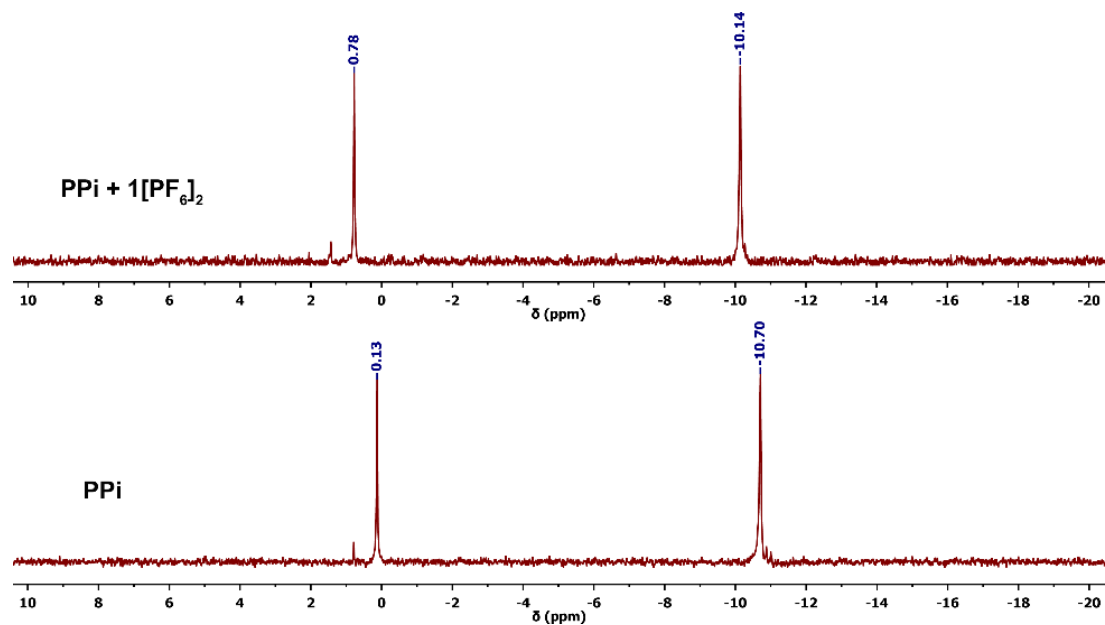

**Figure S12.** <sup>31</sup>P NMR spectra of H<sub>2</sub>P<sub>2</sub>O<sub>7</sub><sup>2-</sup> and with **1**[PF<sub>6</sub>]<sub>2</sub> (1.0 equiv.) in CD<sub>3</sub>CN.

**Table S3** Selected theoretical bond lengths [ $\text{\AA}$ ] and angles [ $^\circ$ ] for complex **1**[PF<sub>6</sub>]<sub>2</sub> obtained from ground state optimized geometry.

| <b>Bond lengths(<math>\text{\AA}</math>)</b> |       |              |       |
|----------------------------------------------|-------|--------------|-------|
| N(32)-Ru(51)                                 | 2.120 | N(39)-Ru(51) | 2.120 |
| N(11)-Ru(51)                                 | 2.119 | N(4)-Ru(51)  | 2.126 |
| N(25)-Ru(51)                                 | 2.126 | N(18)-Ru(51) | 2.119 |

  

| <b>Bond Angles(<math>^\circ</math>)</b> |        |                    |       |
|-----------------------------------------|--------|--------------------|-------|
| N(32)-Ru(51)-N(39)                      | 77.65  | N(25)-Ru(51)-N(18) | 78.54 |
| N(4)-Ru(51)-N(11)                       | 78.54  | N(39)-Ru(51)-N(18) | 95.92 |
| N(4)-Ru(51)-N(18)                       | 96.92  | N(32)-Ru(51)-N(18) | 88.98 |
| N(4)-Ru(51)-N(25)                       | 88.96  | N(4)-Ru(51)-N(39)  | 96.92 |
| N(25)-Ru(51)-N(11)                      | 96.92  | N(39)-Ru(51)-N(11) | 88.98 |
| N(18)-Ru(51)-N(11)                      | 172.72 | N(39)-Ru(51)-N(25) | 172.4 |
| N(32)-Ru(51)-N(4)                       | 172.4  |                    |       |

**Table S4.** The x,y,z cartesian coordinates of complex **1**, obtained from DFT optimization at B3LYP/6-31G (d, p) // LANL2DZ level.

|   | x        | y        | z        |    | x        | y        | z        |
|---|----------|----------|----------|----|----------|----------|----------|
| C | 4.35282  | 3.47608  | -0.24455 | C  | -4.37904 | 5.03714  | 0.65587  |
| C | 4.07275  | 2.92444  | 0.99171  | C  | -4.3352  | 5.4963   | 2.1186   |
| C | 3.08265  | 1.93308  | 1.09897  | O  | -4.26657 | 6.90509  | 2.0661   |
| N | 2.38636  | 1.48857  | 0.04921  | N  | -4.31093 | -3.58586 | -0.49623 |
| C | 2.66007  | 2.02391  | -1.18055 | C  | -4.37959 | -5.03667 | -0.65589 |
| C | 3.6382   | 3.02876  | -1.37835 | C  | -4.33576 | -5.49584 | -2.11861 |
| C | 1.90736  | 1.52908  | -2.29453 | O  | -4.26727 | -6.90471 | -2.06606 |
| C | 2.137    | 2.05047  | -3.59096 | Ru | 0.86905  | -0.00004 | 0.0      |
| C | 3.13241  | 3.07139  | -3.76346 | H  | 5.11242  | 4.24478  | -0.35312 |
| C | 3.85285  | 3.53886  | -2.70372 | H  | 4.60316  | 3.24329  | 1.88251  |
| N | 0.98488  | 0.54957  | -2.04308 | H  | 2.84241  | 1.48763  | 2.05792  |
| C | 0.26963  | 0.07809  | -3.06787 | H  | 3.30263  | 3.46566  | -4.76085 |
| C | 0.43158  | 0.54126  | -4.38471 | H  | 4.60433  | 4.30959  | -2.84671 |
| C | 1.3644   | 1.52606  | -4.6513  | H  | -0.45299 | -0.69461 | -2.83117 |
| C | 1.36422  | -1.5262  | 4.6513   | H  | -0.17886 | 0.11756  | -5.17488 |
| C | 0.43152  | -0.5413  | 4.38471  | H  | 1.50895  | 1.89905  | -5.66109 |
| C | 0.26962  | -0.07811 | 3.06787  | H  | 1.50873  | -1.8992  | 5.66109  |
| N | 0.98482  | -0.54967 | 2.04308  | H  | -0.17889 | -0.11754 | 5.17488  |
| C | 1.90719  | -1.52928 | 2.29453  | H  | -0.45292 | 0.69466  | 2.83117  |
| C | 2.13678  | -2.05069 | 3.59097  | H  | 4.60386  | -4.31008 | 2.84672  |
| C | 2.65985  | -2.02419 | 1.18055  | H  | 3.30225  | -3.46601 | 4.76085  |
| C | 3.63788  | -3.02914 | 1.37835  | H  | 2.84226  | -1.48792 | -2.05792 |
| C | 3.85247  | -3.53926 | 2.70373  | H  | 4.60282  | -3.24377 | -1.88251 |
| C | 3.13208  | -3.07172 | 3.76347  | H  | 5.11196  | -4.24532 | 0.35313  |
| N | 2.38621  | -1.48881 | -0.04921 | H  | -1.77825 | -4.4824  | -0.72167 |
| C | 3.08245  | -1.9334  | -1.09897 | H  | 0.21689  | -3.08742 | -0.51655 |
| C | 4.07245  | -2.92487 | -0.9917  | H  | -5.4066  | 1.17691  | 0.17535  |
| C | 4.35245  | -3.47653 | 0.24456  | H  | -5.40672 | -1.17635 | -0.17537 |
| C | -3.18051 | -2.84791 | -0.42656 | H  | 0.21721  | 3.0874   | 0.51656  |
| C | -1.90075 | -3.42213 | -0.54226 | H  | -1.77778 | 4.48259  | 0.72166  |
| C | -0.76422 | -2.63316 | -0.42953 | H  | -5.19407 | 3.10683  | 0.41739  |
| N | -0.78339 | -1.31058 | -0.22037 | H  | -3.56081 | 5.51044  | 0.10494  |
| C | -2.01198 | -0.71051 | -0.11289 | H  | -5.30773 | 5.38376  | 0.19539  |
| C | -3.23203 | -1.41693 | -0.21531 | H  | -5.23278 | 5.13641  | 2.64431  |
| C | -2.01191 | 0.71072  | 0.11288  | H  | -3.45888 | 5.05562  | 2.62328  |
| C | -3.23189 | 1.41727  | 0.2153   | H  | -4.43988 | 7.26827  | 2.94757  |
| C | -4.44672 | 0.6769   | 0.10051  | H  | -5.19439 | -3.10626 | -0.4174  |
| C | -4.44679 | -0.67644 | -0.10052 | H  | -3.56143 | -5.51007 | -0.10493 |
| N | -0.78325 | 1.31066  | 0.22037  | H  | -5.30834 | -5.38317 | -0.19544 |
| C | -0.76395 | 2.63324  | 0.42952  | H  | -5.23329 | -5.1359  | -2.64435 |
| C | -1.90039 | 3.42233  | 0.54225  | H  | -3.45938 | -5.05529 | -2.62329 |
| C | -3.18021 | 2.84825  | 0.42655  | H  | -4.44053 | -7.26787 | -2.94755 |
| N | -4.31055 | 3.58632  | 0.4962   |    |          |          |          |

## References

1. SAINT Plus, version 7.03; Bruker AXS, Inc.: Madison, WI, **2004**.
2. SADABS Empirical Absorption Correction Program; University of Göttingen: Göttingen, Germany, **1997**.
3. Sheldrick, G. M. SHELXT – Integrated Space-Group and Crystal-Structure Determination. *Acta Cryst.* **2015**, *A71*, 3–8.
4. Sheldrick, G. M. Crystal Structure Refinement with SHELXL. *Acta Crystallogr. Sect. C Struct. Chem.* **2015**, *71*, 3–8.
5. Farrugia, L. J. WinGX and ORTEP for Windows : An Update. *J. Appl. Crystallogr.* **2012**, *456*, 849–854.
